# Supplementary material for: Видимые и скрытые причины задержки роста сельскохозяйственного производства в России. Направления поиска антикризисных мер
Source: Royal Society of Chemistry journal article supplement (doi:10.1039/d0ra05666a), 2011-01-01
Supplement: d0ra05666a1.pdf [file d0ra05666a1.pdf]

Fig S1. TEM images of Fe<sub>2</sub>P(IL6)/CNTs

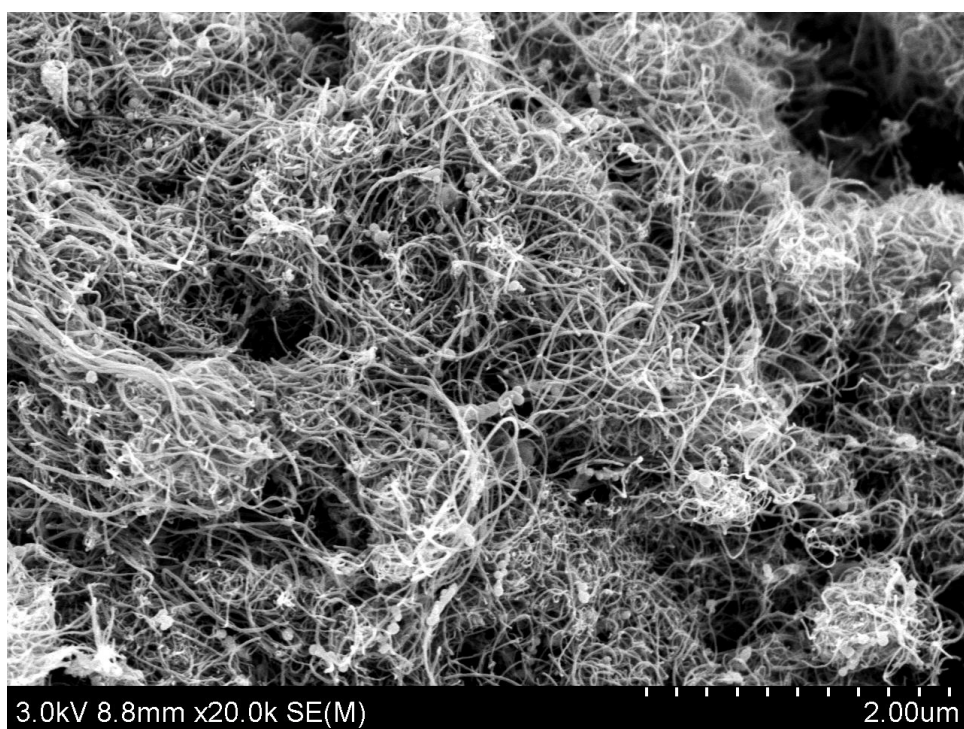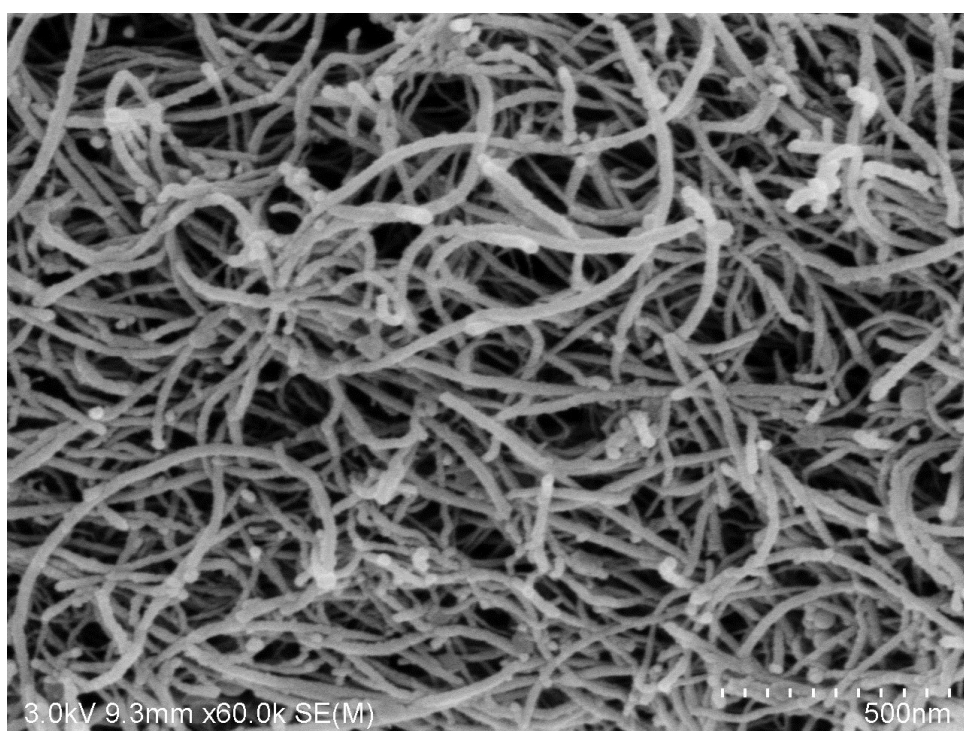

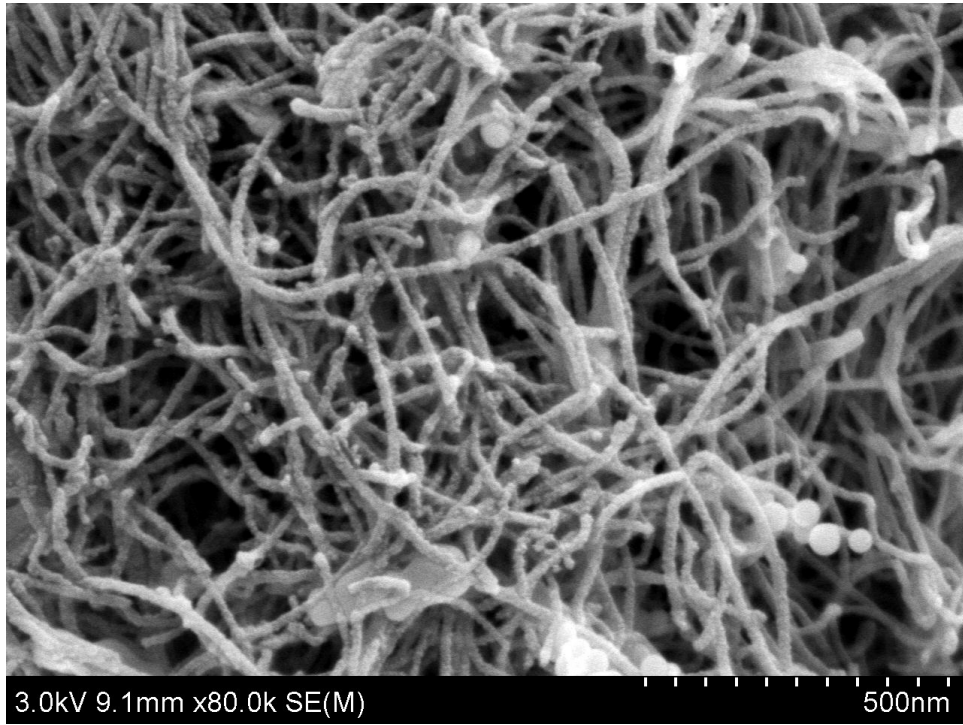

Fig S2. Distribution histogram and Scherrer analysis results of  $\text{Fe}_2\text{P}(\text{IL6})/\text{CNTs}$

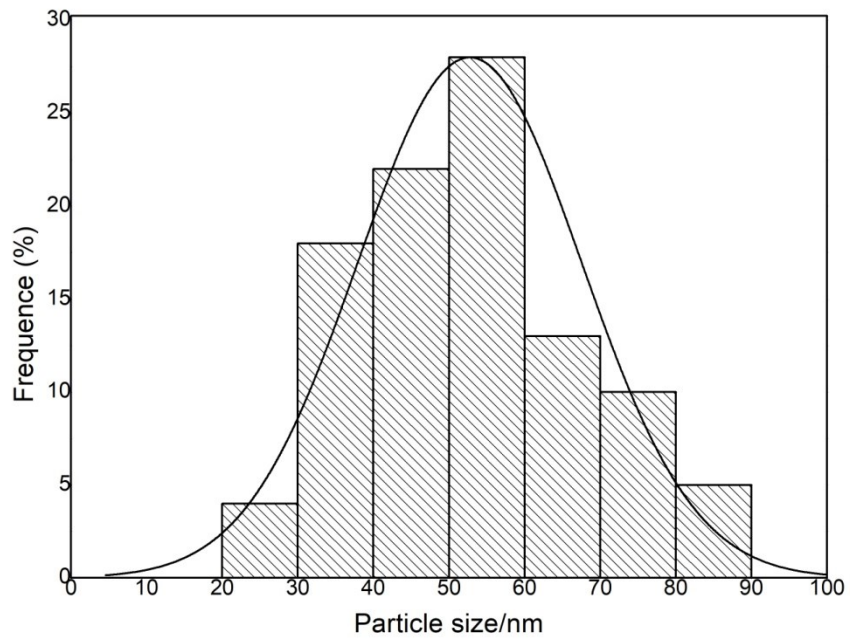

Distribution histogram of  $\text{Fe}_2\text{P}(\text{IL6})/\text{CNTs}$

## Estimate Crystallite Size & Strain from Peak Broadening

FILE: [C6.raw] Commander Sample ID

SCAN: 20.0001/80.0079/0.01949/20.88(sec), Cu(40kV,40mA), I(max)=643, 07/28/20 21:50

NOTE: All Unrejected Peaks, FW(S) = Sample Broadening, Constant FWHM = 0.1

| 2-Theta        | d(?)            | Height   | Shape  | Skew   | FWHM          | FW(S)*Cos(Theta)  | Sin(Theta) |
|----------------|-----------------|----------|--------|--------|---------------|-------------------|------------|
| 23.553 (?)     | 3.7741 (?)      | 22 (?)   | 1.000v | -0.682 | 0.175 (?)     | 0.07348 (?)       | 0.2041     |
| 23.993 (?)     | 3.7059 (?)      | 26 (?)   | 0.500v | 0.608  | 0.271 (?)     | 0.16679 (?)       | 0.2079     |
| 26.760 (?)     | 3.3287 (?)      | 100 (?)  | 0.500v | 0.900  | 0.112 (?)     | 0.01173 (?)       | 0.2314     |
| 40.201 (0.004) | 2.2413 (0.0004) | 641 (11) | 0.221v | 0.234  | 0.257 (0.004) | 0.14747 (0.00412) | 0.3437     |
| 41.009 (0.013) | 2.1990 (0.0014) | 34 (6)   | 1.000v | 0.605  | 0.101 (0.034) | 0.00131 (0.03217) | 0.3503     |
| 42.348 (0.018) | 2.1325 (0.0018) | 58 (3)   | 1.000v | -0.869 | 0.505 (0.051) | 0.37736 (0.04799) | 0.3612     |
| 44.142 (0.010) | 2.0500 (0.0009) | 165 (5)  | 1.000v | 0.468  | 0.435 (0.025) | 0.31082 (0.02311) | 0.3758     |
| 45.682 (0.033) | 1.9844 (0.0027) | 24 (2)   | 0.000v | -0.449 | 0.278 (0.054) | 0.16395 (0.04991) | 0.3882     |
| 47.193 (0.017) | 1.9243 (0.0013) | 72 (25)  | 0.138v | -0.761 | 0.258 (0.054) | 0.14483 (0.04981) | 0.4003     |
| 48.341 (0.023) | 1.8812 (0.0017) | 19 (4)   | 1.000v | 0.897  | 0.190 (0.075) | 0.08174 (0.06851) | 0.4095     |
| 51.080 (0.033) | 1.7866 (0.0022) | 20 (2)   | 1.000v | -0.892 | 0.460 (0.101) | 0.32487 (0.09108) | 0.4311     |
| 52.748 (0.019) | 1.7340 (0.0012) | 58 (3)   | 0.000v | 0.094  | 0.345 (0.020) | 0.21939 (0.01805) | 0.4442     |
| 54.117 (0.012) | 1.6933 (0.0007) | 72 (12)  | 0.000v | 0.651  | 0.158 (0.022) | 0.05128 (0.01931) | 0.4549     |
| 56.796 (0.037) | 1.6196 (0.0019) | 13 (3)   | 0.301v | 0.899  | 0.184 (0.099) | 0.07356 (0.08737) | 0.4756     |
| 66.212 (?)     | 1.4103 (?)      | 18 (?)   | 1.000v | 0.527  | 0.127 (?)     | 0.02228 (?)       | 0.5462     |
| 73.503 (?)     | 1.2873 (?)      | 17 (?)   | 0.000v | -0.714 | 0.190 (?)     | 0.07251 (?)       | 0.5983     |

\* Fit Size Only: XS(?) = 527 (13), Strain(%) = 0.0, ESD of Fit = 0.00203, LC = 0.016

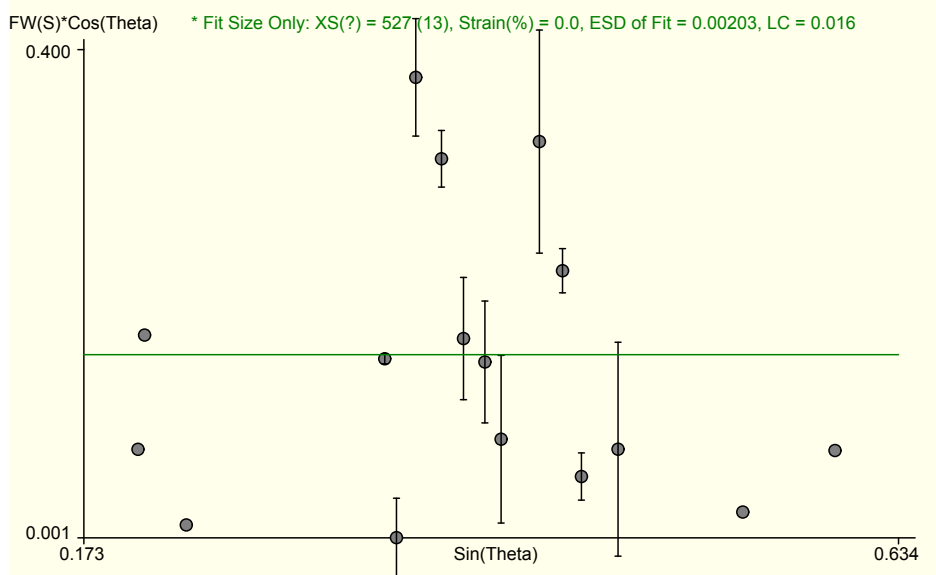

Scherrer analysis results of Fe<sub>2</sub>P(IL6)/CNTs

Fig S3. EDS analysis result of Fe<sub>2</sub>P(IL6)/CNTs

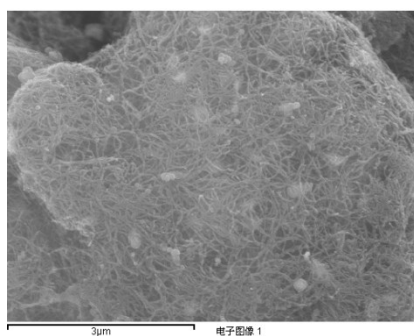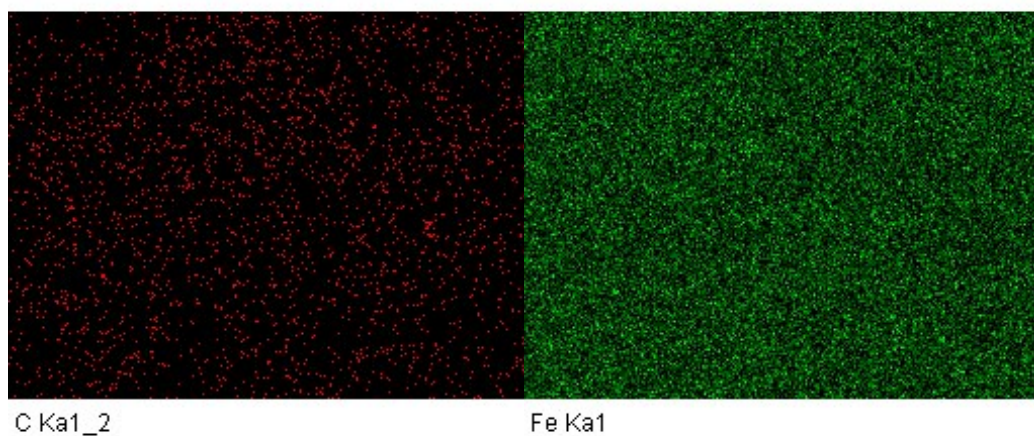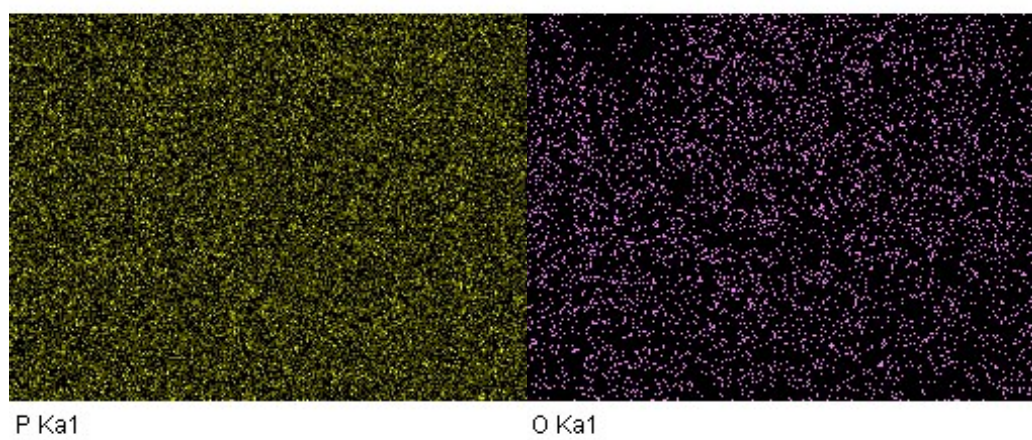

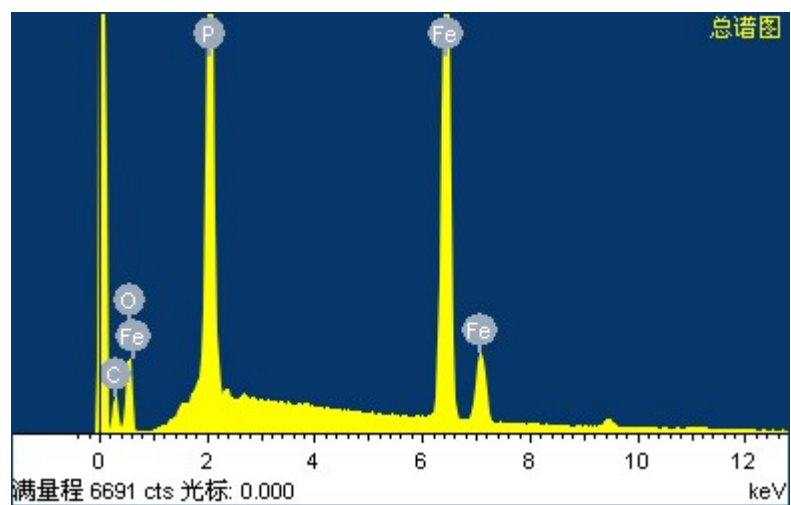

Fig S4. SEM, TEM and EDS analysis result of Fe<sub>2</sub>P(IL<sub>4</sub>)/CNTs

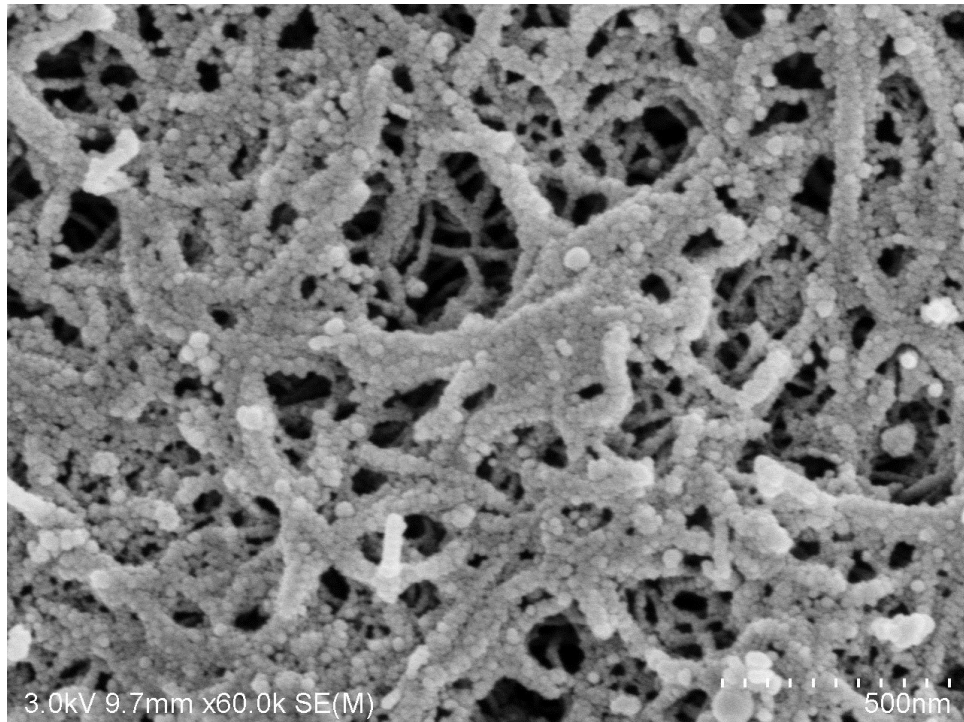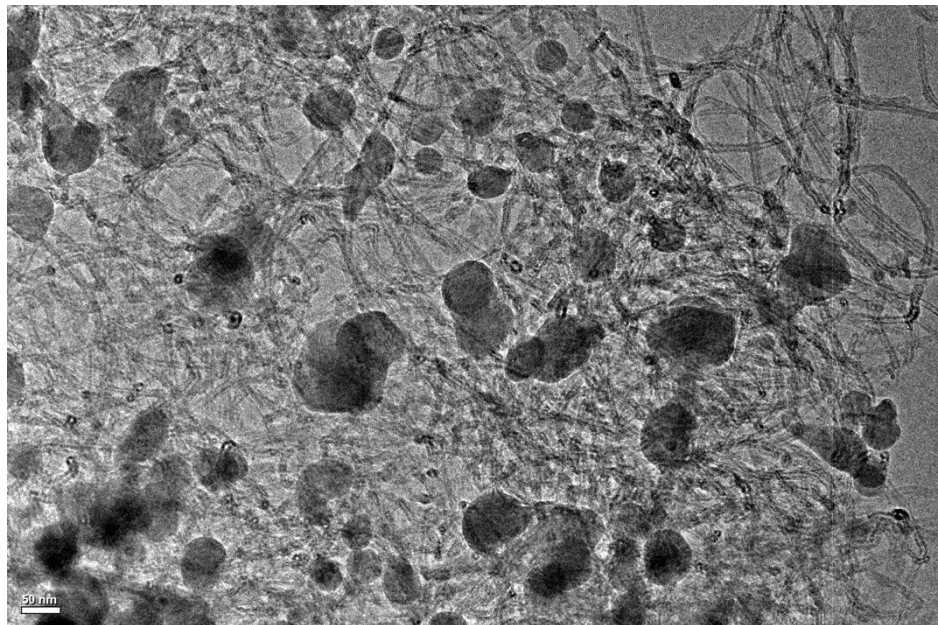

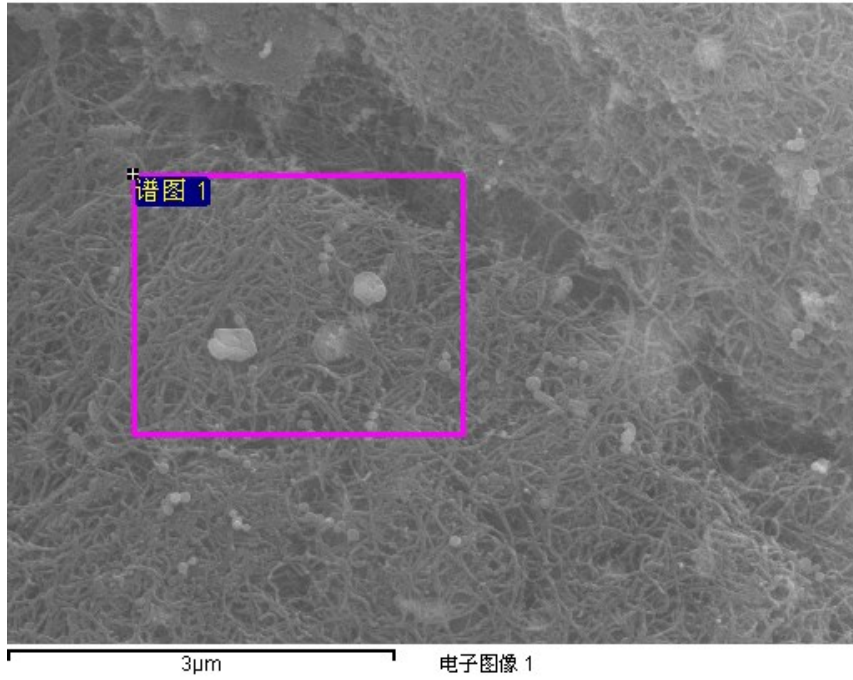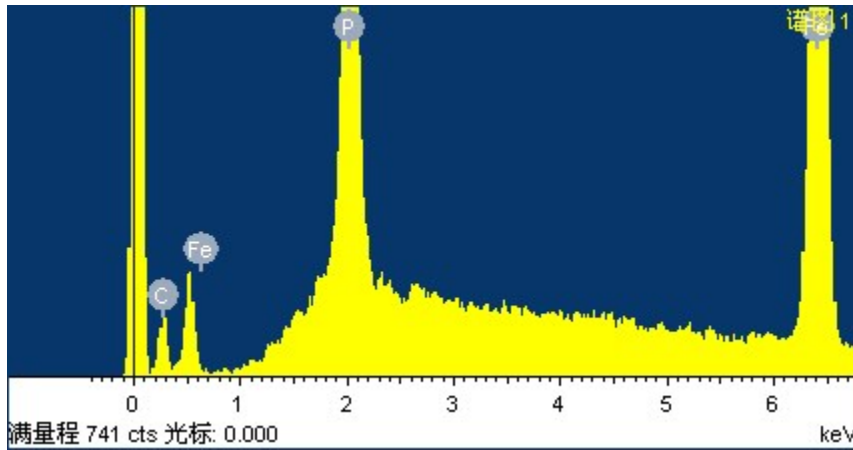

Analysis time = 4

Standard:

- C CaCO<sub>3</sub>
- O SiO<sub>2</sub>
- P GaP
- Fe Fe

| element | Weight percentage | Atom percentage |
|---------|-------------------|-----------------|
| C K     | 15.33             | 37.46           |
| O K     | 8.63              | 15.82           |
| P K     | 16.05             | 15.20           |
| Fe K    | 59.99             | 31.52           |
| total   | 100.00            |                 |

Fig S5. SEM, TEM and EDS analysis result of FeP/CNTs

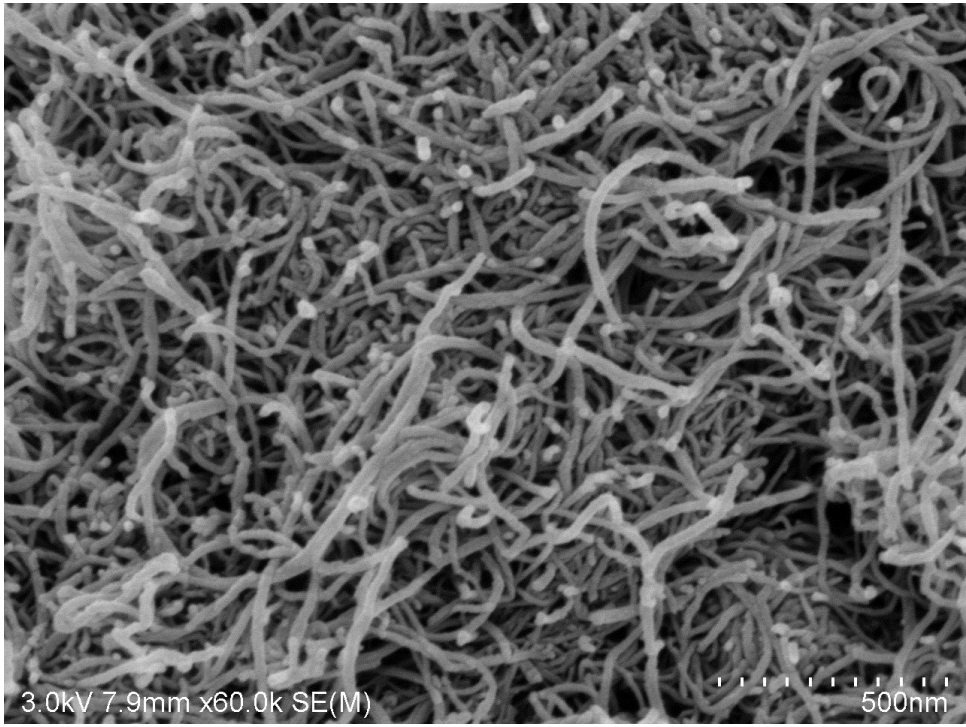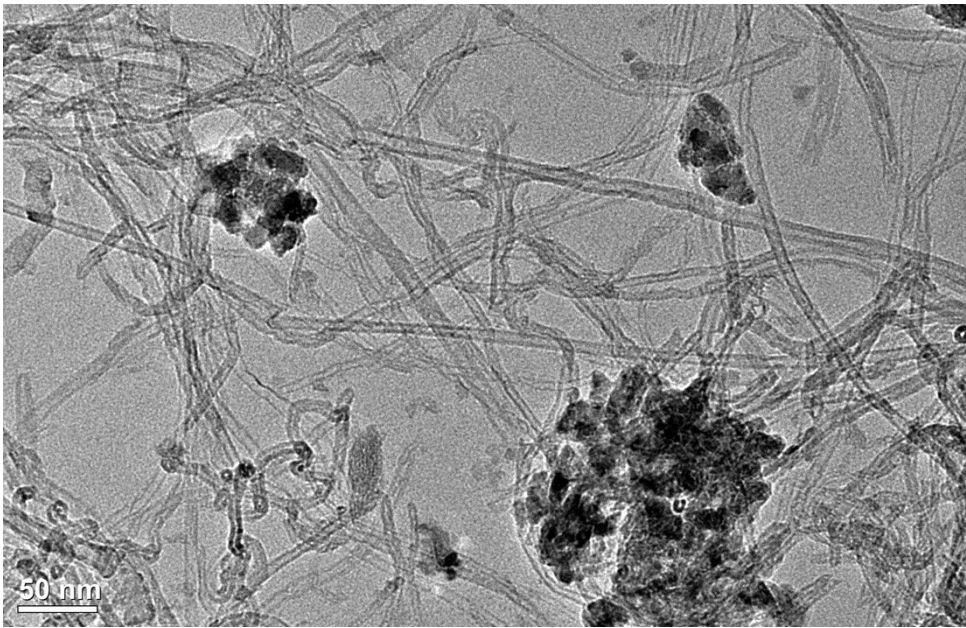



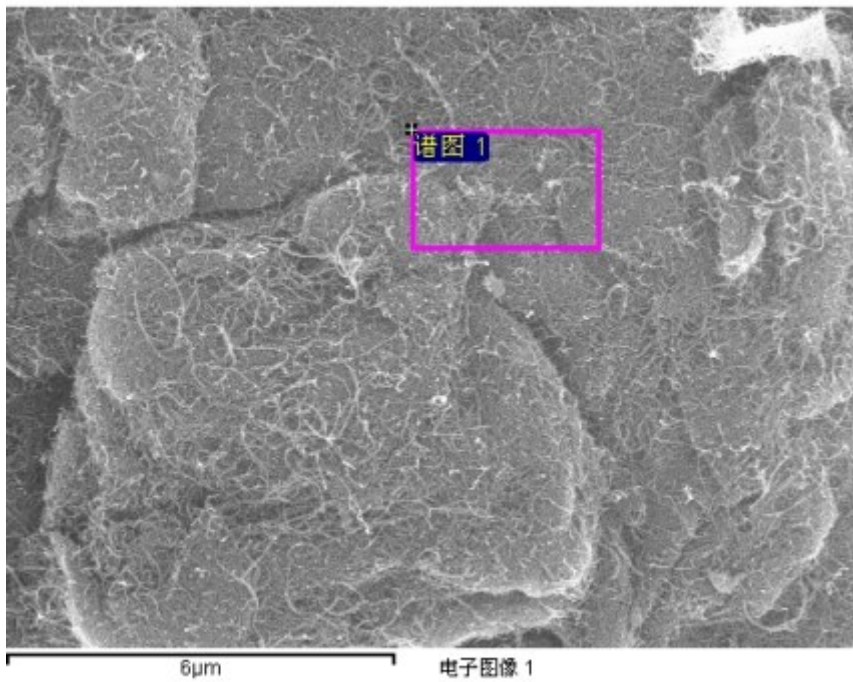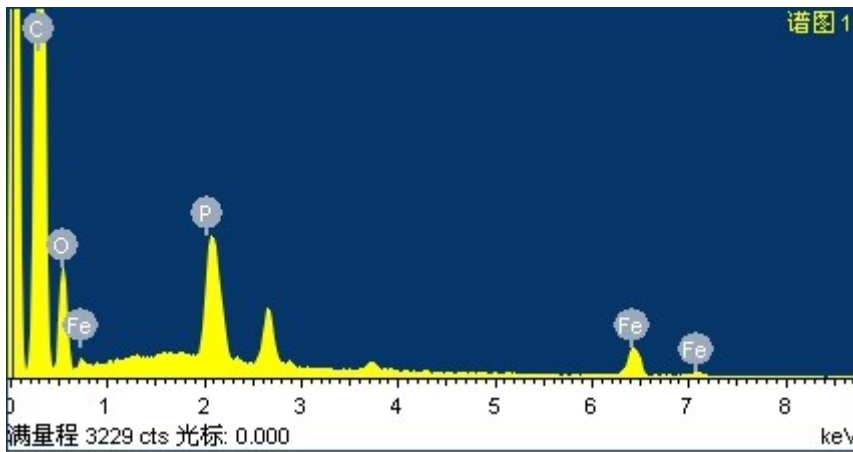

Analysis time = 4

Standard:

C CaCO<sub>3</sub>

O SiO<sub>2</sub>

P GaP

Fe Fe

| element | Weight percentage | Atom percentage |
|---------|-------------------|-----------------|
| C K     | 72.86             | 79.87           |
| O K     | 22.86             | 18.81           |
| P K     | 1.60              | 0.68            |
| Fe K    | 2.69              | 0.63            |
| total   | 100.00            |                 |

Fig S6. SEM, TEM and EDS analysis result of  $\text{Fe}_2\text{P}(\text{IL6})$

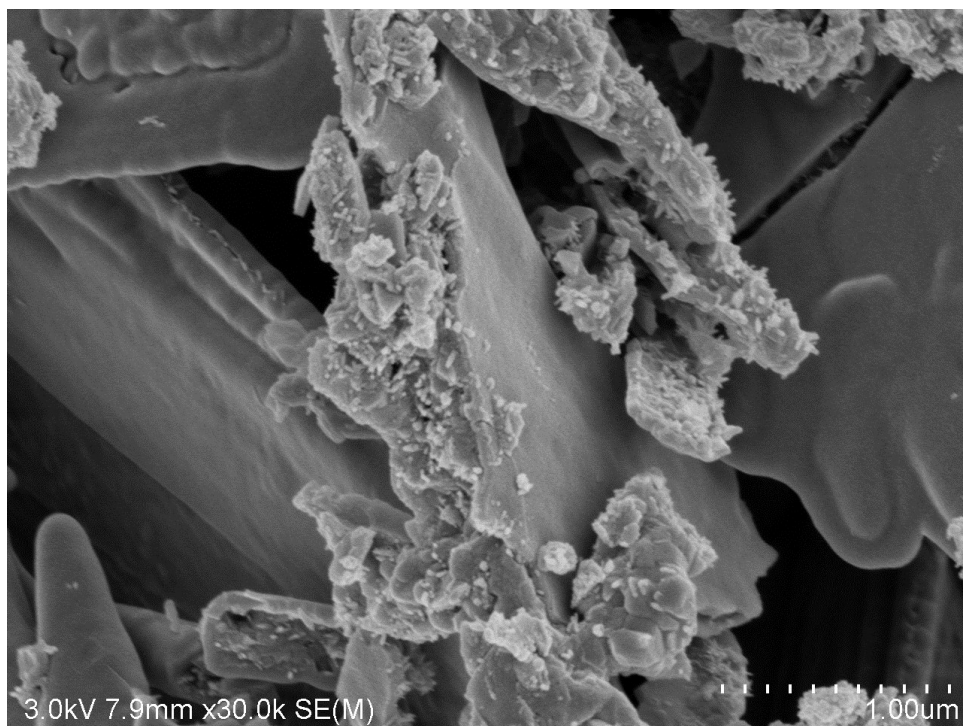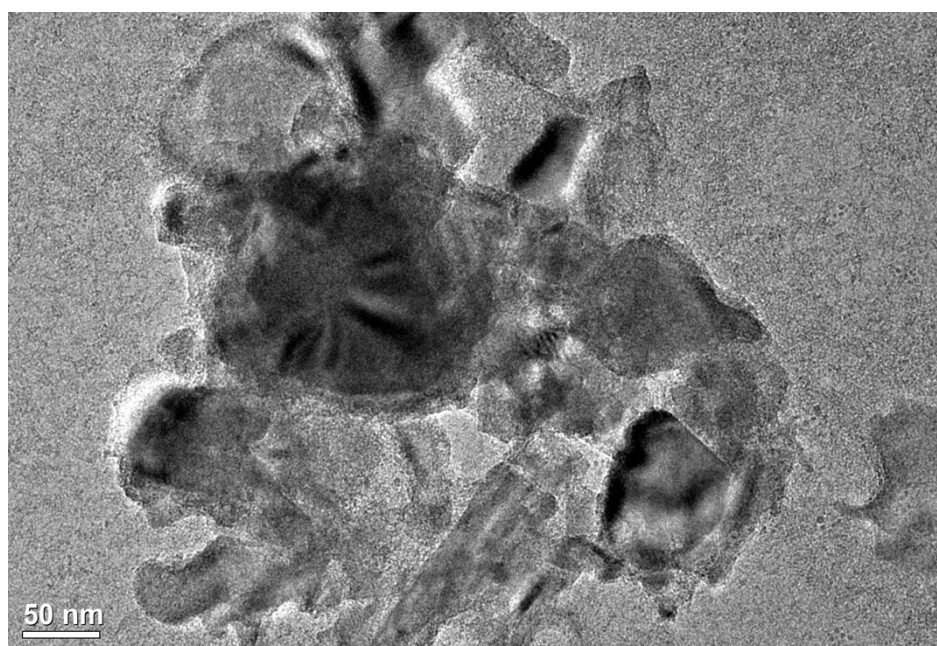

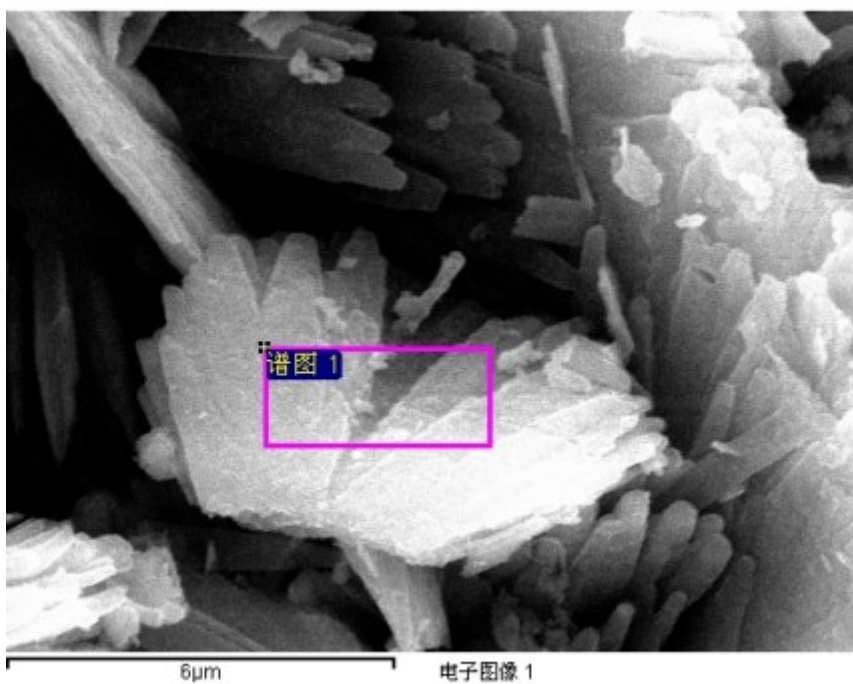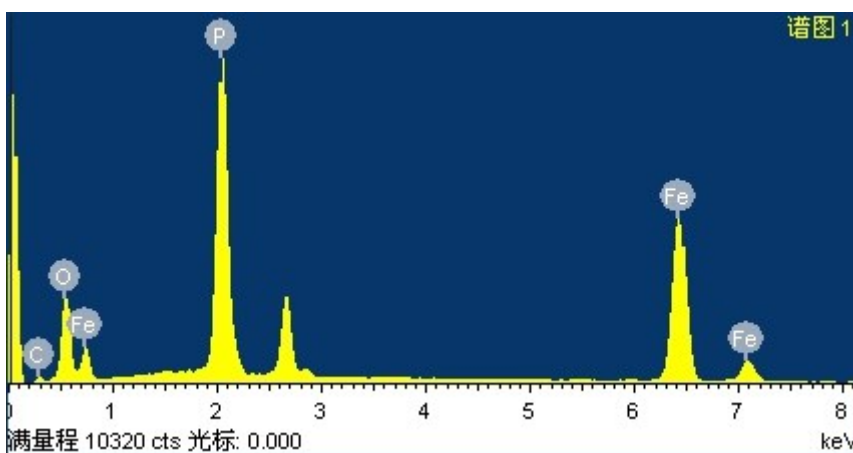

Analysis time = 4

Standard:

C CaCO<sub>3</sub>

O SiO<sub>2</sub>

P GaP

Fe Fe

| element | Weight percentage | Atom percentage |
|---------|-------------------|-----------------|
| C K     | 6.31              | 15.02           |
| O K     | 21.45             | 39.42           |
| P K     | 15.18             | 14.40           |
| Fe K    | 57.23             | 30.04           |
| total   | 100.00            |                 |
